# Supplementary material
Source: publisher site journal article supplement (https://www.dovepress.com/article/265364)
Supplement: Supplementary file 1 [file get_supplementary_file.php]

**Supplemental Table 1**  
**Nucleotide sequences of the primers used for QRT-PCR.**

| Gene           | Accession number | Forward Primer          | Reverse Primer          |
|----------------|------------------|-------------------------|-------------------------|
| <b>B2M</b>     | NM_004048        | GATGAGTATGCCTGCCGTGT    | CTGCTTACATGTCTCGATCCCA  |
| <b>HPRT</b>    | NM_000194        | TGGACAGGACTGAACGTCTTG   | CCAGCAGGTCAGCAAAGAATTTA |
| <b>AR</b>      | NM_000044        | TTGTCCATCTTGTCGTCTTCGG  | GCCTCTCCTTCCTCCTGTAGT   |
| <b>CDH1</b>    | NM_004360        | CGAGAGCTACACGTTACGG     | GGGTGTCGAGGGAAAAATAGG   |
| <b>CTNNB</b>   | NM_001904        | TACCTCCCAAGTCCTGTATGAG  | TGAGCAGCATCAAACCTGTGTAG |
| <b>SNAIL</b>   | NM_005985        | AATCGGAAGCCTAACTACAGCG  | GTCCCAGATGAGCATTGGCA    |
| <b>STAT3</b>   | NM_139276        | ATCACGCCTTCTACAGACTGC   | CATCCTGGAGATTCTCTACCACT |
| <b>TWIST</b>   | NM_000474        | GTCCGCAGTCTTACGAGGAG    | GCTTGAGGGTCTGAATCTTGCT  |
| <b>CDK1</b>    | NM_001786        | AAACTACAGGTCAAGTGGTAGCC | TCCTGCATAAGCACATCCTGA   |
| <b>CCNB1</b>   | NM_031966        | AATAAGGCGAAGATCAACATGGC | TTGTTACCAATGTCCCAAGAG   |
| <b>BIRC5</b>   | NM_001168        | CCAGATGACGACCCCATAGAG   | TTGTTGGTTTCCTTTGCAATTTT |
| <b>CASP3</b>   | NM_004346        | ATGGAAGCGAATCAATGGACT   | CTGTACCAGACCGAGATGTCA   |
| <b>BCL2</b>    | NM_000633        | GGGGAGGATTGTGGCCTTC     | CAGGGCGATGTTGTCCACC     |
| <b>CDKN1A</b>  | NM_000389        | CCTGTCACTGTCTTGTACCCT   | GCGTTTGGAGTGGTAGAAATCT  |
| <b>GADD45A</b> | NM_001924        | GAGAGCAGAAGACCGAAAGGA   | CACAACACCACGTTATCGGG    |
| <b>ZEB1</b>    | NM_001128128     | CTACAACAACAAGACACTGCTGT | TGTTCTTTCAGAGAGGTAAACCG |
| <b>AURKA</b>   | NM_198433        | GGATATCTCAGTGGCGGACG    | GCAATGGAGTGAGACCCTCT    |
